# Supplementary material
Source: HighWire-hosted journal article supplement (https://jnm.snmjournals.org/highwire/filestream/100072/field_highwire_adjunct_files/0/249508_Supplemental_Data.pdf)
Supplement: 249508_Supplemental_Data.pdf [file 249508_Supplemental_Data.pdf]

**Supplemental Table 1:** <sup>18</sup>F-FDG uptake values measured with PET/CT imaging

| <b>Treatment Group</b>            | <b>Baseline<br/>(max %ID/g)</b> | <b>Treatment<br/>Day 7<br/>(max %ID/g)</b> | <b>Baseline<br/>(T:M)</b> | <b>Treatment<br/>Day 7<br/>(T:M)</b> |
|-----------------------------------|---------------------------------|--------------------------------------------|---------------------------|--------------------------------------|
| <b>WT-ER Tumor Control</b>        | 8.30 ± 0.35                     | 8.05 ± 1.04                                | 6.37 ± 0.74               | 5.01 ± 0.77*                         |
| <b>WT-ER Tumor Fulvestrant</b>    | 7.56 ± 0.71                     | 4.62 ± 0.79*                               | 6.13 ± 1.37               | 3.66 ± 0.57*                         |
| <b>Y537S-ER Tumor Control</b>     | 10.24 ± 1.25                    | 9.20 ± 1.00*                               | 7.06 ± 0.86               | 5.39 ± 0.63                          |
| <b>Y537S-ER Tumor Fulvestrant</b> | 8.86 ± 1.14                     | 6.12 ± 0.57                                | 6.84 ± 1.30               | 3.89 ± 0.37                          |
| <b>Muscle Control</b>             | 1.38 ± 0.10                     | 1.65 ± 0.09                                | N/A                       | N/A                                  |
| <b>Muscle Fulvestrant</b>         | 1.36 ± 0.09                     | 1.46 ± 0.15                                | N/A                       | N/A                                  |

\*Significant change in <sup>18</sup>F-FDG uptake when compared to baseline imaging (paired t-test; N=6 tumors per treatment group).

**Supplemental Table 2:** <sup>18</sup>F-FFNP uptake values measured with PET/CT imaging

| <b>Treatment Group</b>             | <b>Baseline<br/>(max %ID/g)</b> | <b>Treatment<br/>Day 7<br/>(max %ID/g)</b> | <b>Baseline<br/>(T:M)</b> | <b>Treatment<br/>Day 7<br/>(T:M)</b> |
|------------------------------------|---------------------------------|--------------------------------------------|---------------------------|--------------------------------------|
| <b>WT-ER Tumor Control</b>         | 3.97 ± 0.35                     | 3.80 ± 0.31                                | 4.95 ± 0.45               | 4.71 ± 0.36                          |
| <b>WT-ER Tumor Fulvestrant</b>     | 4.00 ± 0.23                     | 2.10 ± 0.20*                               | 5.26 ± 0.61               | 2.41 ± 0.18*                         |
| <b>Y537S-ER Tumor Control</b>      | 4.20 ± 0.19                     | 3.75 ± 0.35                                | 5.27 ± 0.54               | 4.61 ± 0.38                          |
| <b>Y537S-ER Tumor Fulvestrant</b>  | 4.18 ± 0.37                     | 3.92 ± 0.50                                | 5.41 ± 0.55               | 4.49 ± 0.50                          |
| <b>Pituitary Gland Control</b>     | 2.95 ± 0.07                     | 3.17 ± 0.16                                | N/A                       | N/A                                  |
| <b>Pituitary Gland Fulvestrant</b> | 3.05 ± 0.08                     | 2.07 ± 0.04*                               | N/A                       | N/A                                  |
| <b>Muscle Control</b>              | 0.81 ± 0.04                     | 0.84 ± 0.10                                | N/A                       | N/A                                  |
| <b>Muscle Fulvestrant</b>          | 0.80 ± 0.08                     | 0.87 ± 0.03                                | N/A                       | N/A                                  |

\*Significant change in <sup>18</sup>F-FFNP uptake when compared to baseline imaging (paired t-test; N=6 tumors per treatment group).

**Supplemental Table 3: PR and ER immunohistochemistry of excised tumors**

| <b>Treatment Group</b>            | <b>PR+ (%)</b> | <b>PR Intensity</b> | <b>ER+ (%)</b> | <b>ER Intensity</b>              |
|-----------------------------------|----------------|---------------------|----------------|----------------------------------|
| <b>WT-ER Tumor Control</b>        | 94.00 ± 6.00   | Strong<br>(N=5/5)   | 41.0 ± 4.58    | Moderate (N=2/5)<br>Weak (N=3/5) |
| <b>WT-ER Tumor Fulvestrant</b>    | 56.25 ± 23.00  | Moderate<br>(N=4/4) | 0              | None<br>(N=4/4)                  |
| <b>Y537S-ER Tumor Control</b>     | 80.00 ± 13.78  | Strong<br>(N=5/5)   | 46.4 ± 12.1    | Moderate (N=1/5)<br>Weak (N=4/5) |
| <b>Y537S-ER Tumor Fulvestrant</b> | 80.00 ± 18.77  | Strong<br>(N=5/5)   | 0*             | None*<br>(N=5/5)                 |

\*Residual ER protein detectable by Western blot analysis (Supplemental Figure 3)

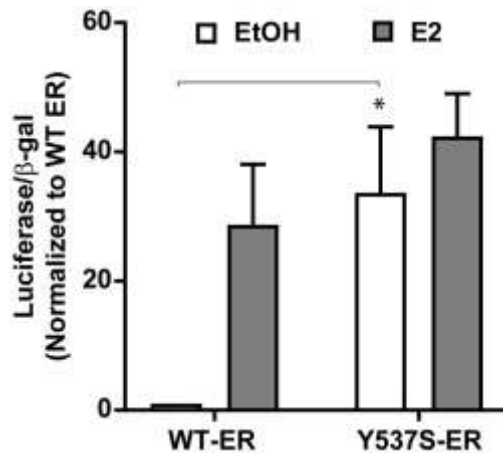

**Supplemental Figure 1: Estrogen-dependent and estrogen-independent ER transcriptional activity of CRISPR-edited T47D breast cancer cells expressing WT-ER and Y537S-ER.**

Cells were grown in steroid hormone-depleted media for 3 days and were seeded in a 6-well plate (500,000 cells/well). On day 5, cells were co-transfected with estrogen receptor response element (ERE)-luciferase (0.75  $\mu$ g) and cytomegalovirus- $\beta$ -galactosidase (0.25  $\mu$ g) reporter plasmids using Lipofectamine 3000 (Life Technologies). The following day, cells were treated with ethanol (EtOH) vehicle or 10 nM 17 $\beta$ -estradiol (E2) for 24 hours. Luciferase reporter gene activity (Promega) and  $\beta$ -galactosidase activity (Tropix) were measured according to the manufacturers' protocol. ERE-luciferase reporter gene activity was normalized to  $\beta$ -galactosidase activity to control for transfection efficiency. Data was normalized to WT-ER in the absence of E2 (N=3 independent experiments). \* $P < 0.05$  compared to WT-ER.

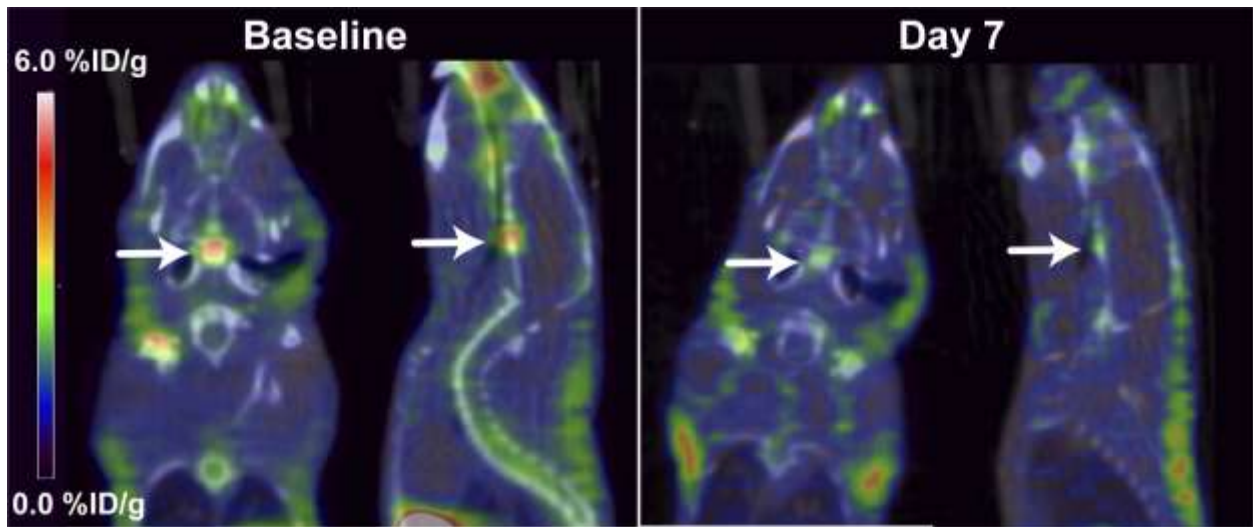

**Supplemental Figure 2:** Representative horizontal/coronal and sagittal fused  $^{18}\text{F}$ -FFNP PET/CT images demonstrating pituitary gland uptake (arrows) at baseline and 7 days after starting fulvestrant treatment.

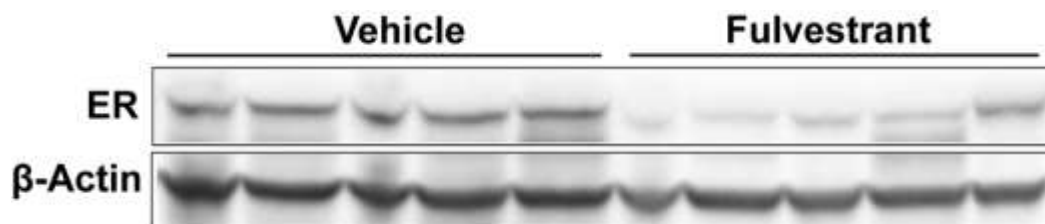

**Supplemental Figure 3:** Western blot for ER and  $\beta$ -actin protein in the excised Y537S-ER tumors from the  $^{18}\text{F}$ -FFNP biodistribution assay on day 7 post treatment with either ethanol vehicle control or fulvestrant. Tumor lysates were prepared from flash-frozen tumors excised on day 7 post treatment from the  $^{18}\text{F}$ -FFNP biodistribution assay. Crushed flash-frozen tumors were lysed using radioimmunoprecipitation assay buffer (Sigma) with 2 mM sodium orthovanadate, protease (1:500) and phosphatase (1:100) inhibitor cocktails (Sigma). Protein concentration was determined with Bradford assay (Bio-Rad). Equal amounts of protein were run on 10% sodium-dodecyl sulfate-polyacrylamide gel electrophoresis (Bio-Rad) and transferred to a polyvinylidene difluoride membrane (Millipore). Saturating amounts of antibodies were used for ER (1:1,000 clone 6F11; Leica Biosystems),  $\beta$ -actin (1:20,000 clone AC-15; Sigma) as a loading control, and horseradish peroxidase-conjugated anti-mouse IgG (1:3,000; GE Healthcare).
